# Supplementary material
Source: MDPI journal article supplement (https://www.mdpi.com/2673-3978/2/4/32)
Supplement: s1 [file s1]

Supplementary materials

# Carbon Nanotubes Blended Nematic Liquid Crystal for Display and Electro-Optical Applications

Bhupendra Pratap Singh <sup>1</sup>, Samiksha Sikarwar <sup>2</sup>, Kamal Kumar Pandey <sup>3</sup>, Rajiv Manohar <sup>1</sup>, Michael Depriester <sup>4</sup> and Dharmendra Pratap Singh <sup>5,\*</sup>

<sup>1</sup> Liquid Crystal Research Lab, Department of Physics, University of Lucknow, Lucknow 226007, India; bhu-pendraphy@gmail.com (B.P.S.); rajiv.manohar@gmail.com (R.M.)

<sup>2</sup> Integrated Basic Science, School of Physical and Decision Sciences, Babasaheb Bhimrao Ambedkar University, Lucknow-226025, India; samiksha9.2009@gmail.com

<sup>3</sup> Department of Physics, Shri Jai Narain Misra Post Graduate College, Lucknow 226001, India, Lucknow 226001, India; kamalpande27@gmail.com

<sup>4</sup> Université du Littoral Côte d'Opale, UR 4476, UDSMM, Unité de Dynamique et Structure des Matériaux Moléculaires, 145, Av Maurice Schumann, 59140 Dunkerque, France; Michael.Depriester@univ-littoral.fr

<sup>5</sup> Université du Littoral Côte d'Opale, UR 4476, UDSMM, Unité de Dynamique et Structure des Matériaux Moléculaires, F-62228 Calais, France

\* Correspondence: dharmendra.singh@univ-littoral.fr; Tel.: +33-(0)3-21-46-57-58

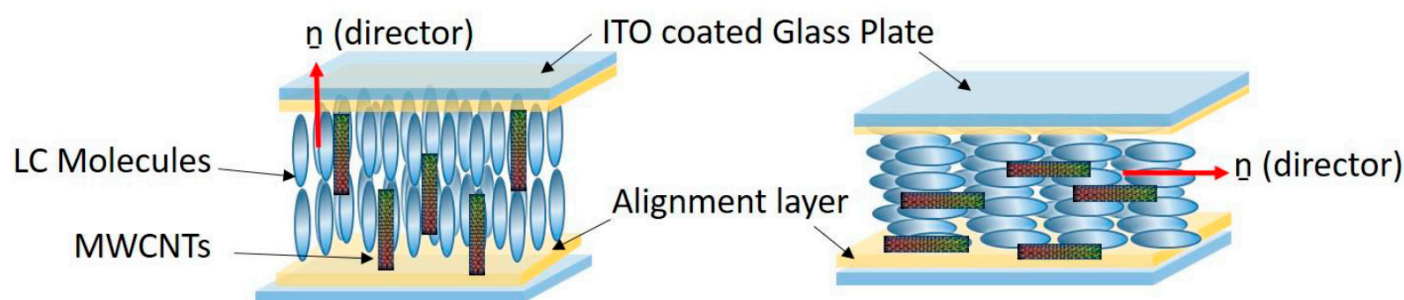

**Figure S1.** Illustration of E7 LC molecules/MWCNTs composite. The figure depicts that the free energy of the LC-CNT composite would be minimum, when CNTs are aligned along the director.
